# Supplementary material for: Modelled-Microgravity Reduces Virulence Factor Production in Staphylococcus aureus through Downregulation of agr-Dependent Quorum Sensing
Source: MDPI journal article supplement (doi:10.3390/ijms242115997), 2023-11-06
Supplement: s1 [file s1]

# Modelled-Microgravity Reduces Virulence Factor Production in *Staphylococcus aureus* through Downregulation of *agr*-Dependent Quorum Sensing

Macauley J. Green <sup>1</sup>, Ewan J. Murray <sup>2</sup>, Paul Williams <sup>2</sup>, Amir M. Ghaemmaghami <sup>3</sup>, Jonathan W. Aylott <sup>1</sup> and Philip M. Williams <sup>1,\*</sup>

<sup>1</sup> School of Pharmacy, University of Nottingham, University Park, Nottingham NG7 2RD, UK;  
macauley.green@nottingham.ac.uk (M.J.G.)

<sup>2</sup> Biodiscovery Institute and School of Life Sciences, University of Nottingham, University Park, Nottingham NG7 2RD, UK;  
paul.williams@nottingham.ac.uk (P.W.)

<sup>3</sup> School of Life Sciences, University of Nottingham, University Park, Nottingham NG7 2RD, UK  
\* Corresponding authors: phil.williams@nottingham.ac.uk (P.M.W.)

## Supplementary Material

**Fig. S1** Transmission electron microscopy of USA300 (A) and SH1000 (B)

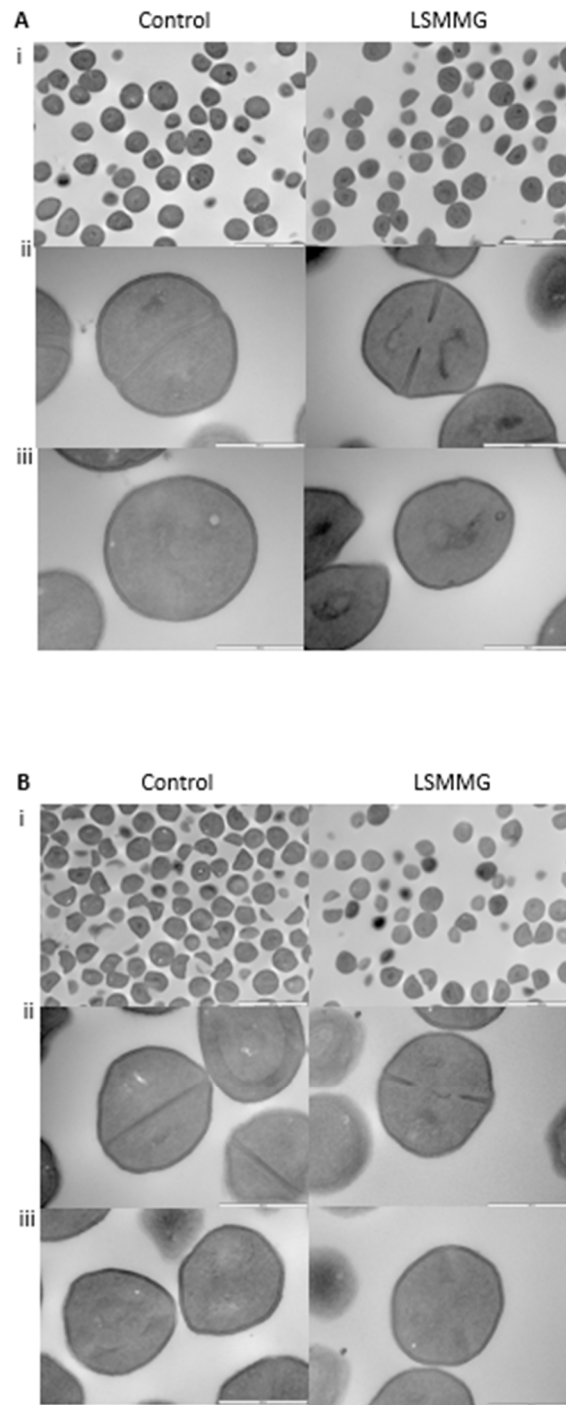

**Figure S1:** Transmission electron microscopy of USA300 (A) and SH1000 (B) in the late exponential phase of growth in X-Vivo 15 medium. (i) ×11500, (ii) 60000× of dividing cells and (iii) 60000× magnification of non-dividing cells.
